# Supplementary material
Source: Springer Nature journal article supplement (https://www.springermedizin.de/resource/supplementary/12914_2009_116_MOESM4_ESM.pdf/9536796)

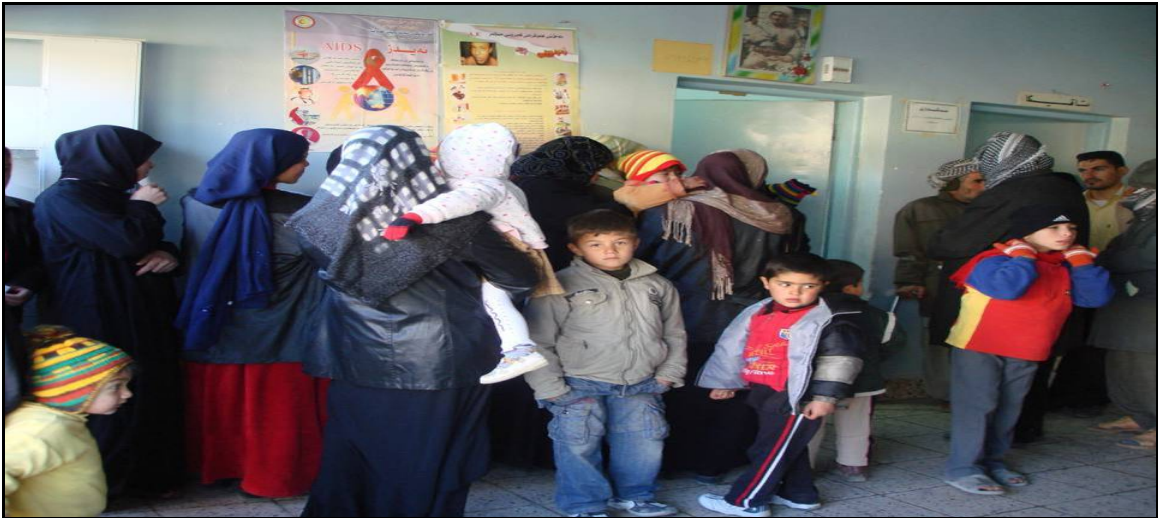

Supplement: MOESM4 [file 9536796]
